# Supplementary material for: Disruptive colouration in reef fish: does matching the background reduce predation risk?
Source: Oxford University Press journal article supplement (doi:10.1242/jeb.151480), 2017-05-31
Supplement: jeb151480supp.pdf [file jeb151480supp.pdf]

**Table S1.** The number of trials that each predator completed for each experiment. The predator identity also includes the month and year that the experiments were completed. JF = Jan-Feb; MJ = May-June; 12 = 2012; 13 = 2013; 14 = 2014.

| Species                       | Experiment | Predator identity | Number of trials completed |    |
|-------------------------------|------------|-------------------|----------------------------|----|
| <i>Epibulus insidiator</i>    | 1          | AJan14            | 18                         |    |
|                               |            | AJul13            | 18                         |    |
|                               |            | BJan14            | 18                         |    |
|                               |            | CJan14            | 18                         |    |
|                               |            | DJan14            | 18                         |    |
|                               | 2          | EJan14            | 18                         |    |
|                               |            | AJan14            | 18                         |    |
|                               |            | AJul13            | 18                         |    |
|                               |            | BJan14            | 18                         |    |
|                               |            | CJan14            | 18                         |    |
|                               | 3          | DJan14            | 18                         |    |
|                               |            | EJan14            | 18                         |    |
|                               |            | AJan14            | 18                         |    |
|                               |            | AJul13            | 18                         |    |
|                               |            | BJan14            | 18                         |    |
|                               | 4          | CJan14            | 18                         |    |
|                               |            | DJan14            | 18                         |    |
|                               |            | EJan14            | 18                         |    |
|                               |            | 5                 | AJan14                     | 18 |
|                               |            |                   | BJan14                     | 18 |
| CJan14                        | 18         |                   |                            |    |
| DJan14                        | 18         |                   |                            |    |
| EJan14                        | 18         |                   |                            |    |
| <i>Plectropomus leopardus</i> | 1          | DJan14            | 18                         |    |
|                               |            | EJan14            | 18                         |    |
|                               |            | BJF13             | 18                         |    |
|                               |            | BMJ12             | 17                         |    |
|                               |            | DJF13             | 18                         |    |
|                               | 2          | AJF12             | 30                         |    |
|                               |            | AJF13             | 18                         |    |

|          |               |           |
|----------|---------------|-----------|
|          | <b>BJF12</b>  | <b>18</b> |
|          | <b>BJF13</b>  | <b>17</b> |
|          | <b>CJF12</b>  | <b>18</b> |
|          | <b>DJF12</b>  | <b>18</b> |
|          | <b>DJF13</b>  | <b>18</b> |
|          | <b>FJF13</b>  | <b>30</b> |
|          | <hr/>         |           |
|          | <b>AJF13</b>  | <b>18</b> |
|          | <b>BJF13</b>  | <b>22</b> |
| <b>3</b> | <b>CJF13</b>  | <b>19</b> |
|          | <b>DJF13</b>  | <b>14</b> |
|          | <b>EJF13</b>  | <b>18</b> |
|          | <b>FJF13</b>  | <b>18</b> |
|          | <hr/>         |           |
|          | <b>AJan14</b> | <b>18</b> |
| <b>4</b> | <b>BJan14</b> | <b>18</b> |
|          | <b>CJan14</b> | <b>18</b> |
|          | <b>DJan14</b> | <b>18</b> |
|          | <hr/>         |           |
|          | <b>AJan14</b> | <b>18</b> |
| <b>5</b> | <b>BJan14</b> | <b>18</b> |
|          | <b>CJan14</b> | <b>18</b> |
|          | <b>DJan14</b> | <b>18</b> |
|          | <hr/>         |           |

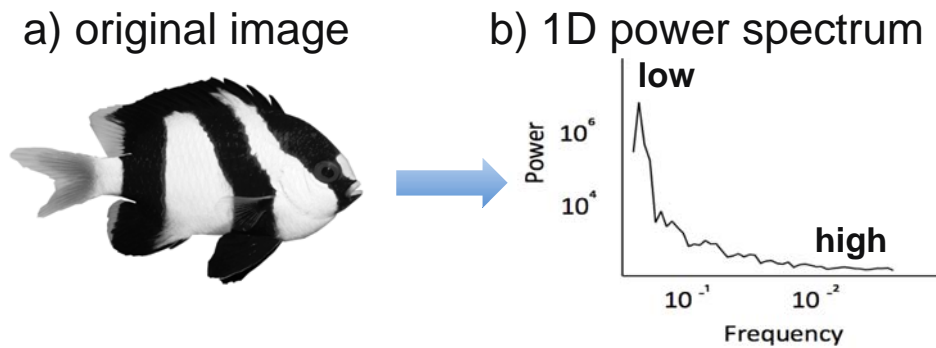

**Fig. S1.** Fast Fourier Transformation (FFT) of: A) an image or object within an image. The power spectrum is obtained (B) which shows a 1D ‘power spectrum’ graph showing the power of different frequencies within an image. The slope of this graph or the peak frequencies within this graph are used to compare the spatial frequencies contained within specific objects or images.
